# Supplementary material
Source: PubMed Central journal article supplement (PMC8988025)
Supplement: jamacardiol-e220340-s001.pdf [file jamacardiol-e220340-s001.pdf]

## Supplemental Online Content

Thornton GD, Musa TA, Rigolli M, et al. Association of myocardial fibrosis and stroke volume by cardiovascular magnetic resonance with outcome in patients with severe aortic stenosis after valve replacement: the British Society of Cardiovascular Magnetic Resonance AS700 study. *JAMA Cardiol*. Published online April 6, 2022. doi:10.1001/jamacardio.2022.0340

**eTable 1.** Baseline characteristics

**eTable 2.** Univariable analysis of all-cause mortality

**eTable 3.** Univariable analysis of cardiovascular mortality

**eFigure 1.** Univariable cardiovascular survival by  $SV_{iCMR}$

**eFigure 2.** Partial association plots of hazard ratio of all-cause death

This supplementary material has been provided by the authors to give readers additional information about their work.

**eTable 1.** Baseline characteristics

| <b>Characteristic</b>                            | <b>N = 674<sup>†</sup></b> |
|--------------------------------------------------|----------------------------|
| <b>Age</b>                                       | 75 (66, 80)                |
| <b>Male Sex</b>                                  | 425 (63%)                  |
| <b>Atrial Fibrillation</b>                       | 84 (12%)                   |
| <b>BMI</b>                                       | 27.0 (24.1, 30.5)          |
| <b>Type 2 Diabetes</b>                           | 146 (22%)                  |
| <b>Hypertension</b>                              | 358 (53%)                  |
| <b>NYHA class</b>                                |                            |
| I                                                | 81 (13%)                   |
| II                                               | 258 (42%)                  |
| III                                              | 248 (41%)                  |
| IV                                               | 22 (3.6%)                  |
| <b>Bicuspid valve</b>                            | 149 (22%)                  |
| <b>Coronary Artery Disease</b>                   | 115 (18%)                  |
| <b>History of MI</b>                             | 73 (11%)                   |
| <b>STS score</b>                                 | 1.75 (1.09, 2.98)          |
| <b>Mean gradient (mmHg)</b>                      | 46 (38, 56)                |
| <b>Peak gradient (mmHg)</b>                      | 78 (66, 96)                |
| <b>Valve area (cm<sup>2</sup>/m<sup>2</sup>)</b> | 0.38 (0.30, 0.44)          |
| <b>LA volume (ml/m<sup>2</sup>)</b>              | 53 (41, 67)                |
| <b>LV EDV (ml/m<sup>2</sup>)</b>                 | 79 (67, 96)                |
| <b>Stroke volume (ml/m<sup>2</sup>)</b>          | 46 (40, 54)                |
| <b>LVEF (%)</b>                                  | 61 (51, 68)                |
| <b>Max. wall thickness (mm)</b>                  | 14.0 (12.0, 16.0)          |
| <b>LV mass (g/m<sup>2</sup>)</b>                 | 81 (66, 97)                |
| <b>RVEF (%)</b>                                  | 65 (58, 71)                |
| <b>LGE Present</b>                               | 341 (56%)                  |
| <b>LGE pattern</b>                               |                            |
| None                                             | 272 (44%)                  |
| Non-infarct                                      | 222 (36%)                  |
| Infarct                                          | 119 (19%)                  |
| <b>LGE (g)</b>                                   | 0.32 (0.00, 2.13)          |

<sup>†</sup>Median (IQR); n (%)

**eTable 2.** Univariable analysis of all-cause mortality

| Characteristic                                   | HR <sup>†</sup> | 95% CI <sup>†</sup> | p-value          |
|--------------------------------------------------|-----------------|---------------------|------------------|
| <b>Age</b>                                       | 1.07            | 1.05, 1.10          | <b>&lt;0.001</b> |
| <b>Male Sex</b>                                  | 0.77            | 0.55, 1.07          | 0.11             |
| <b>Atrial Fibrillation</b>                       | 2.33            | 1.57, 3.45          | <b>&lt;0.001</b> |
| <b>BMI</b>                                       | 0.98            | 0.94, 1.01          | 0.16             |
| <b>Type 2 Diabetes</b>                           | 1.32            | 0.91, 1.90          | 0.14             |
| <b>Hypertension</b>                              | 1.06            | 0.77, 1.47          | 0.71             |
| <b>NYHA class</b>                                |                 |                     |                  |
| I                                                | -               | -                   |                  |
| II                                               | 2.70            | 1.08, 6.79          | <b>0.034</b>     |
| III                                              | 4.16            | 1.66, 10.4          | <b>0.002</b>     |
| IV                                               | 8.75            | 3.03, 25.2          | <b>&lt;0.001</b> |
| <b>Bicuspid valve</b>                            | 0.28            | 0.16, 0.50          | <b>&lt;0.001</b> |
| <b>Coronary Artery Disease</b>                   | 1.51            | 1.02, 2.24          | <b>0.037</b>     |
| <b>History of MI</b>                             | 0.74            | 0.44, 1.23          | 0.24             |
| <b>STS score</b>                                 | 1.18            | 1.13, 1.23          | <b>&lt;0.001</b> |
| <b>Mean gradient (mmHg)</b>                      | 1.01            | 0.99, 1.02          | 0.40             |
| <b>Peak gradient (mmHg)</b>                      | 1.00            | 1.00, 1.01          | 0.41             |
| <b>Valve area (cm<sup>2</sup>/m<sup>2</sup>)</b> | 0.30            | 0.05, 1.70          | 0.17             |
| <b>LA volume (ml/m<sup>2</sup>)</b>              | 1.01            | 1.00, 1.02          | <b>0.002</b>     |
| <b>LV EDV (ml/m<sup>2</sup>)</b>                 | 1.00            | 1.00, 1.01          | 0.24             |
| <b>Stroke volume (ml/m<sup>2</sup>)</b>          | 0.97            | 0.95, 0.98          | <b>&lt;0.001</b> |
| <b>LVEF (%)</b>                                  | 0.98            | 0.97, 0.99          | <b>&lt;0.001</b> |
| <b>RVEF (%)</b>                                  | 0.98            | 0.96, 0.99          | <b>0.001</b>     |
| <b>Max. wall thickness (mm)</b>                  | 0.93            | 0.88, 0.99          | <b>0.014</b>     |
| <b>LV mass (g/m<sup>2</sup>)</b>                 | 1.00            | 0.99, 1.01          | 0.77             |
| <b>LGE Present</b>                               | 2.22            | 1.50, 3.28          | <b>&lt;0.001</b> |
| <b>LGE pattern</b>                               |                 |                     |                  |
| None                                             | -               | -                   |                  |
| Non-infarct                                      | 2.08            | 1.36, 3.17          | <b>&lt;0.001</b> |
| Infarct                                          | 2.49            | 1.55, 4.00          | <b>&lt;0.001</b> |
| <b>LGE (g)</b>                                   | 1.05            | 1.01, 1.08          | <b>0.006</b>     |
| <b>AS Endotype</b>                               |                 |                     |                  |
| HFHG                                             | -               | -                   |                  |
| HFLG                                             | 0.74            | 0.40, 1.37          | 0.34             |
| LFHG                                             | 1.74            | 0.99, 3.03          | 0.052            |
| LFLG                                             | 1.97            | 0.86, 4.53          | 0.11             |

**eTable 3.** Univariable analysis of cardiovascular mortality

| Characteristic                                   | HR <sup>†</sup> | 95% CI <sup>†</sup> | p-value          |
|--------------------------------------------------|-----------------|---------------------|------------------|
| <b>Age</b>                                       | 1.09            | 1.06, 1.12          | <b>&lt;0.001</b> |
| <b>Male Sex</b>                                  | 0.55            | 0.35, 0.89          | <b>0.014</b>     |
| <b>Atrial Fibrillation</b>                       | 3.37            | 2.00, 5.67          | <b>&lt;0.001</b> |
| <b>BMI</b>                                       | 0.97            | 0.92, 1.02          | 0.23             |
| <b>Type 2 Diabetes</b>                           | 1.93            | 1.18, 3.14          | <b>0.009</b>     |
| <b>Hypertension</b>                              | 1.02            | 0.64, 1.63          | 0.94             |
| <b>NYHA class</b>                                |                 |                     |                  |
| I                                                | -               | -                   |                  |
| II                                               | 2.83            | 0.66, 12.2          | 0.16             |
| III                                              | 5.60            | 1.33, 23.5          | <b>0.019</b>     |
| IV                                               | 15.3            | 3.17, 73.7          | <b>&lt;0.001</b> |
| <b>Bicuspid valve</b>                            | 0.25            | 0.11, 0.58          | <b>0.001</b>     |
| <b>CAD</b>                                       | 1.82            | 1.06, 3.11          | <b>0.030</b>     |
| <b>History of MI</b>                             | 0.67            | 0.33, 1.36          | 0.27             |
| <b>STS score</b>                                 | 1.21            | 1.15, 1.28          | <b>&lt;0.001</b> |
| <b>Mean gradient (mmHg)</b>                      | 0.99            | 0.97, 1.01          | 0.51             |
| <b>Peak gradient (mmHg)</b>                      | 1.00            | 0.99, 1.01          | 0.74             |
| <b>Valve area (cm<sup>2</sup>/m<sup>2</sup>)</b> | 0.26            | 0.02, 3.32          | 0.30             |
| <b>LA volume (ml/m<sup>2</sup>)</b>              | 1.02            | 1.01, 1.03          | <b>&lt;0.001</b> |
| <b>LV EDV (ml/m<sup>2</sup>)</b>                 | 1.00            | 1.00, 1.01          | 0.37             |
| <b>Stroke volume (ml/m<sup>2</sup>)</b>          | 0.96            | 0.93, 0.98          | <b>&lt;0.001</b> |
| <b>LVEF (%)</b>                                  | 0.97            | 0.95, 0.98          | <b>&lt;0.001</b> |
| <b>RVEF (%)</b>                                  | 0.96            | 0.95, 0.98          | <b>&lt;0.001</b> |
| <b>Max. wall thickness (mm)</b>                  | 0.91            | 0.84, 0.99          | <b>0.026</b>     |
| <b>LV mass (g/m<sup>2</sup>)</b>                 | 1.00            | 0.99, 1.01          | 0.81             |
| <b>LGE Present</b>                               | 3.38            | 1.84, 6.22          | <b>&lt;0.001</b> |
| <b>LGE pattern</b>                               |                 |                     |                  |
| None                                             | -               | -                   |                  |
| Non-infarct                                      | 2.80            | 1.45, 5.40          | <b>0.002</b>     |
| Infarct                                          | 4.54            | 2.30, 8.97          | <b>&lt;0.001</b> |
| <b>LGE (g)</b>                                   | 1.07            | 1.02, 1.12          | <b>0.003</b>     |
| <b>AS Endotype</b>                               |                 |                     |                  |
| HFHG                                             | -               | -                   |                  |
| HFLG                                             | 0.79            | 0.31, 2.06          | 0.64             |
| LFHG                                             | 2.56            | 1.21, 5.42          | <b>0.014</b>     |
| LFLG                                             | 3.75            | 1.45, 9.71          | <b>0.006</b>     |

**eFigure 1. Univariable cardiovascular survival by SV<sub>ICMR</sub>**

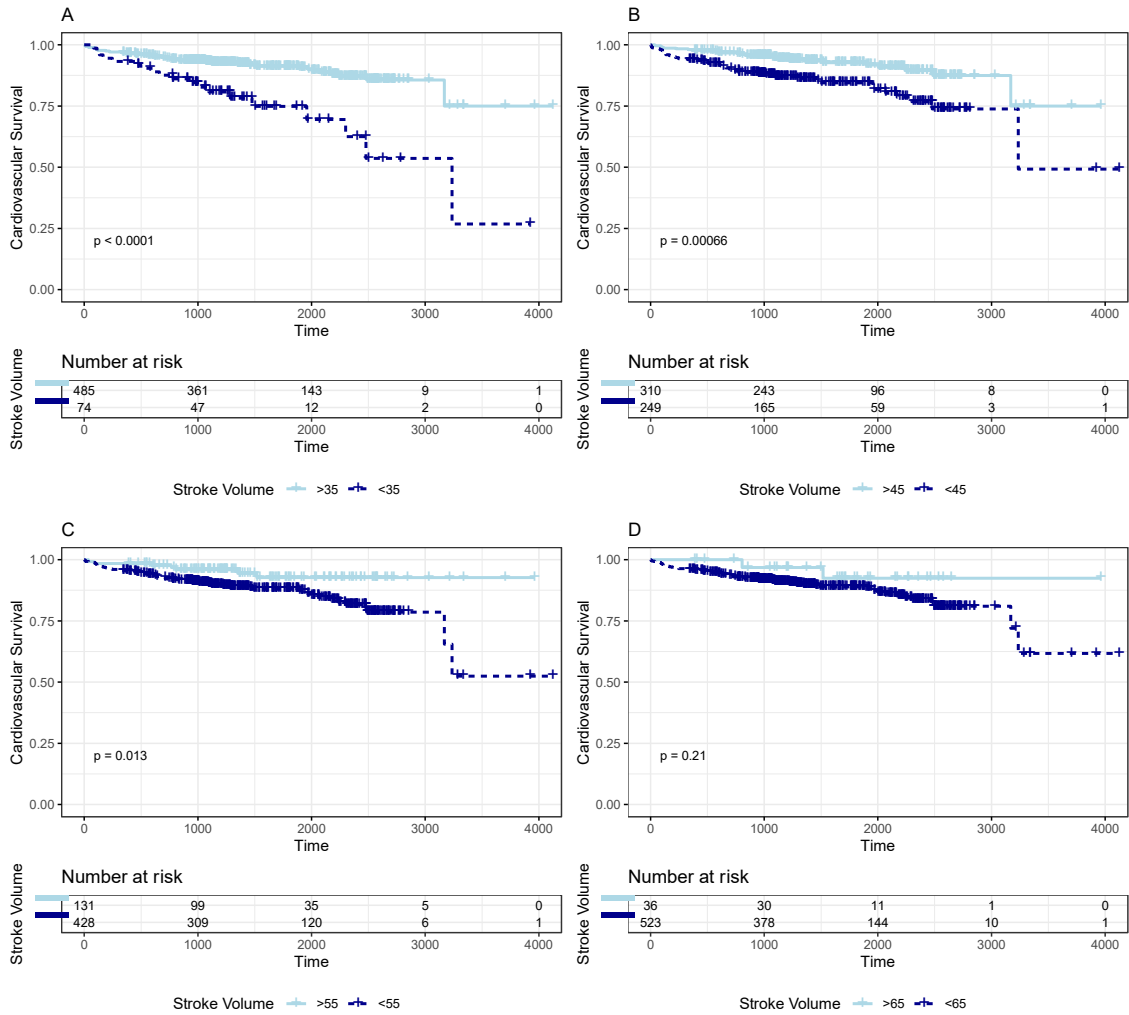

Kaplan-Meier Plots demonstrating differences in cardiovascular mortality when the cohort is divided by different SV<sub>ICMR</sub> thresholds. A, SV<sub>ICMR</sub> threshold of 35ml/m<sup>2</sup>; B, SV<sub>ICMR</sub> threshold of 45ml/m<sup>2</sup>; C, SV<sub>ICMR</sub> threshold of 55ml/m<sup>2</sup>; D, SV<sub>ICMR</sub> threshold of 65 ml/m<sup>2</sup>.

**eFigure 2.** Partial association plots of hazard ratio of all-cause death

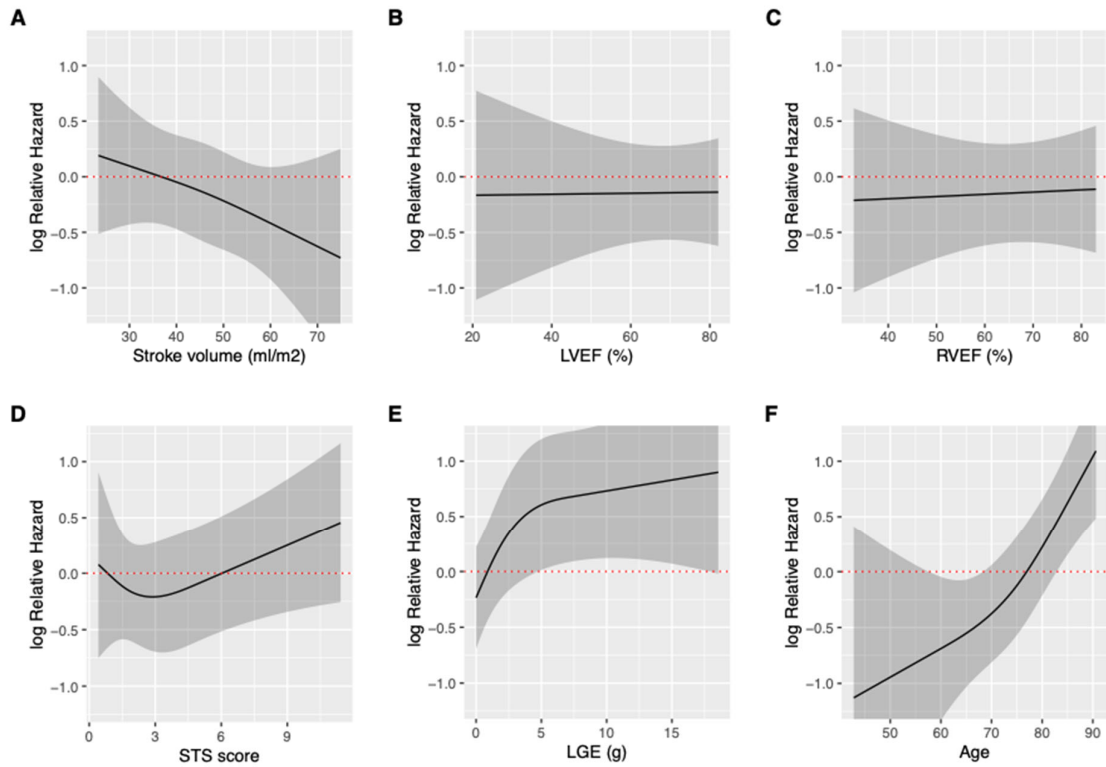

Plots demonstrating the association between individual variables and cardiovascular mortality. The shaded area represents the 95% confidence interval. A, Indexed stroke volume; B Left ventricular ejection fraction; C, Right ventricular ejection fraction; D STS score; E Age.
